# Supplementary material
Source: publisher figshare collection journal article supplement (https://tandf.figshare.com/ndownloader/files/22302477)
Supplement: Supplementary file 1 [file 22302477]

Supporting Information

Reactive mesogens for ultraviolet-transparent liquid crystal polymer networks

R. Plamont* a,b, F. Lancia a,b, A. Ryabchun a,b

a *Stratingh Institute for Chemistry, University of Groningen, Nijenborgh 8, 9747 AG Groningen, The Netherlands*

b *MESA+ Institute for Nanotechnology, University of Twente,* *7500 AE* *Enschede, The Netherlands*

* corresponding author: remi.plamont@gmail.com


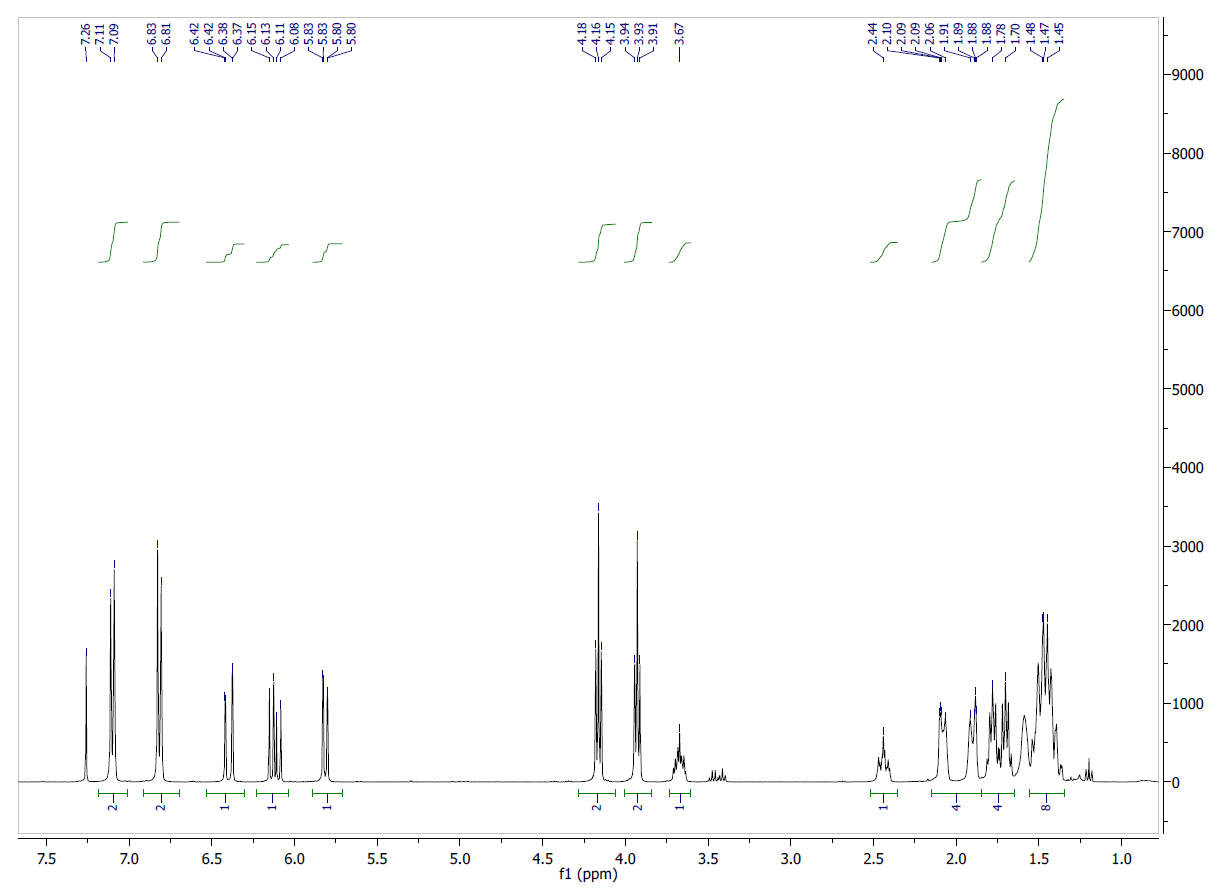


FigureS1. 1H NMR (TOP) (CDCl3, 400 MHz) and 13C NMR (BOTTOM) (CDCl3, 100 MHz) of compound **11**


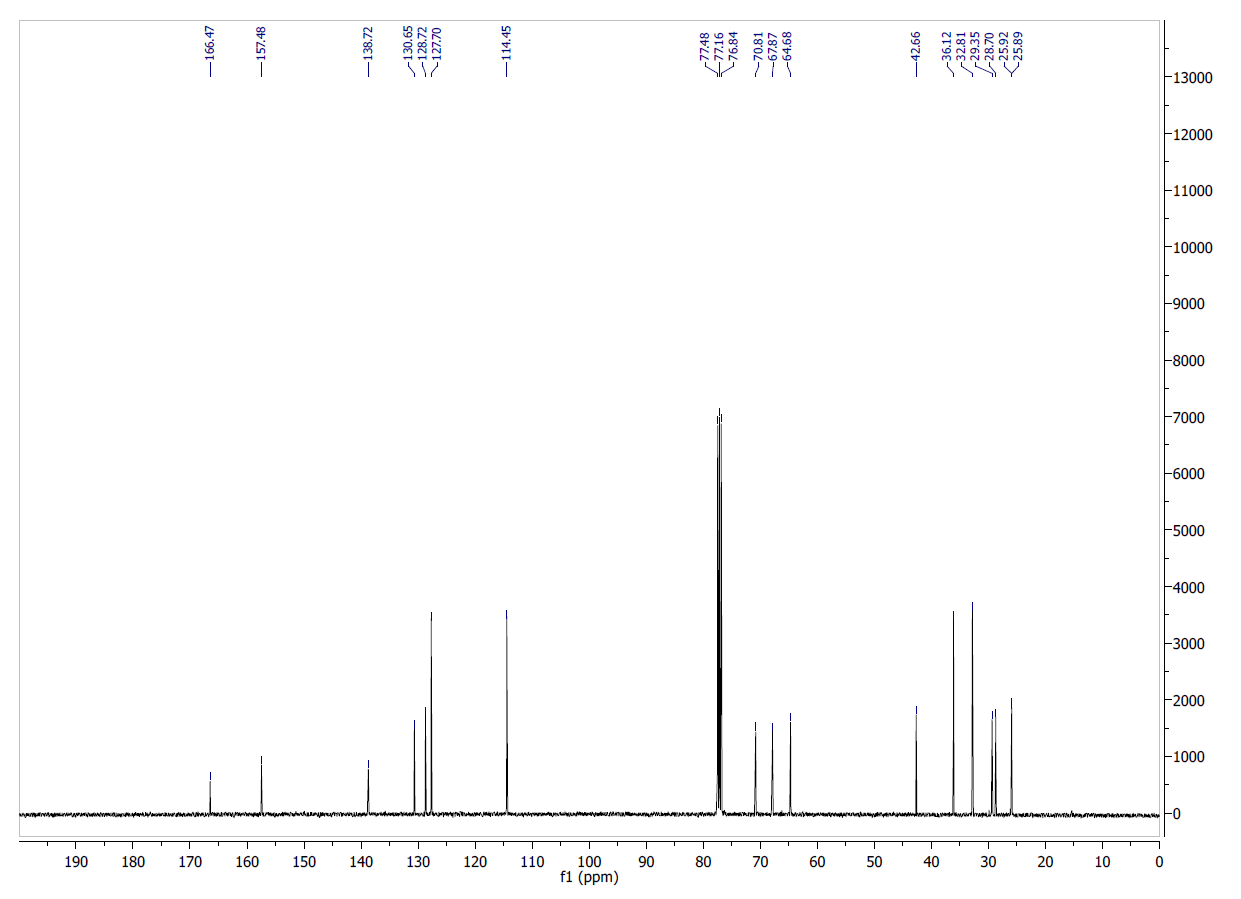

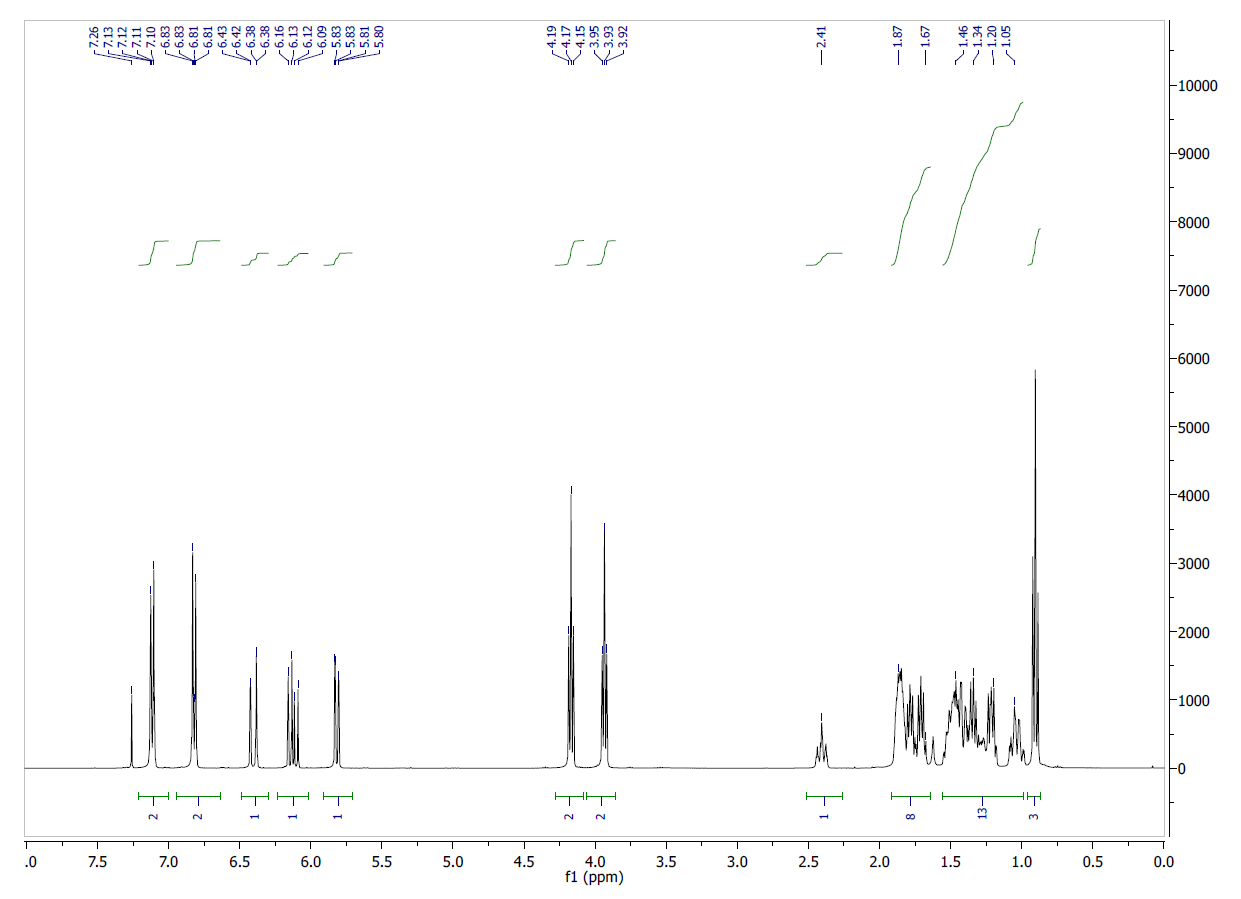


FigureS2. 1H NMR (TOP) (CDCl3, 400 MHz) and 13C NMR (BOTTOM) (CDCl3, 100 MHz) of compound **12**


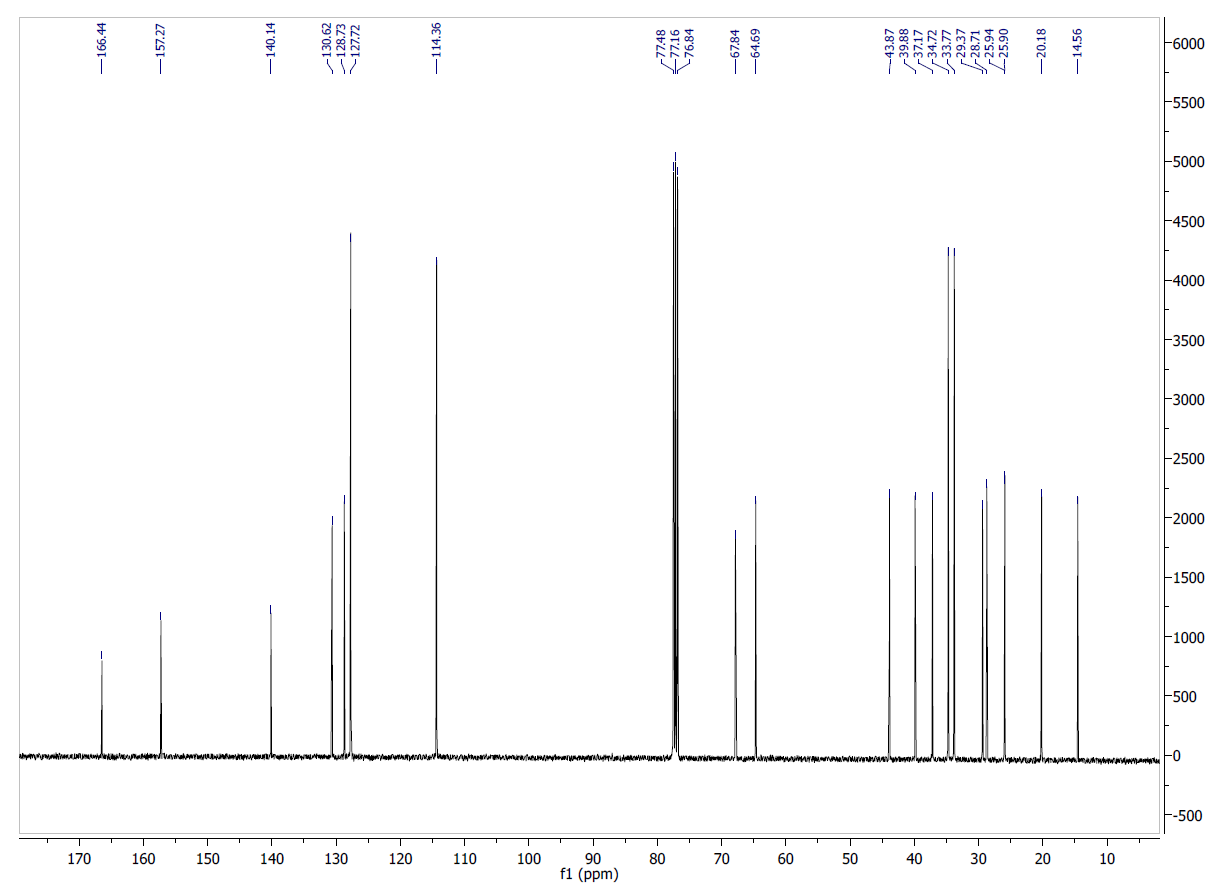


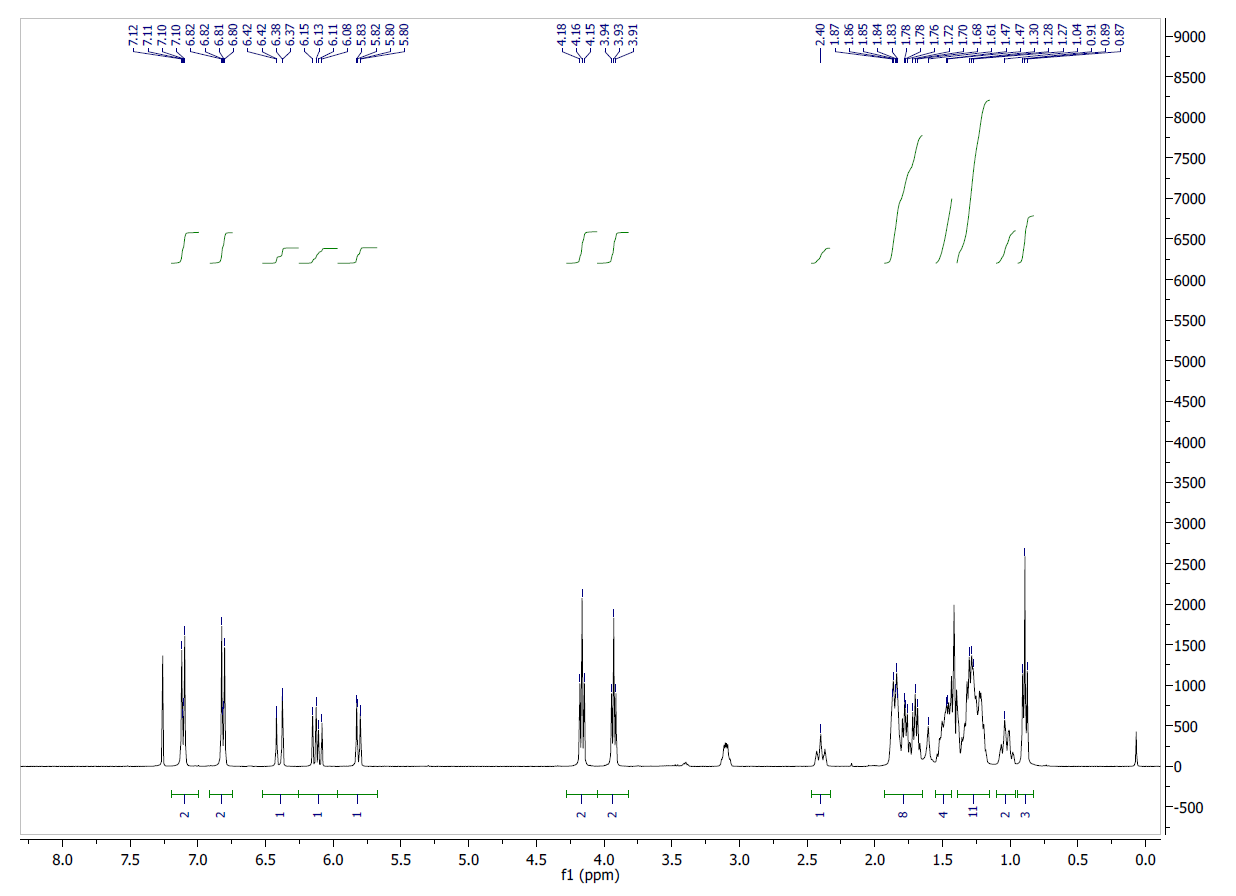


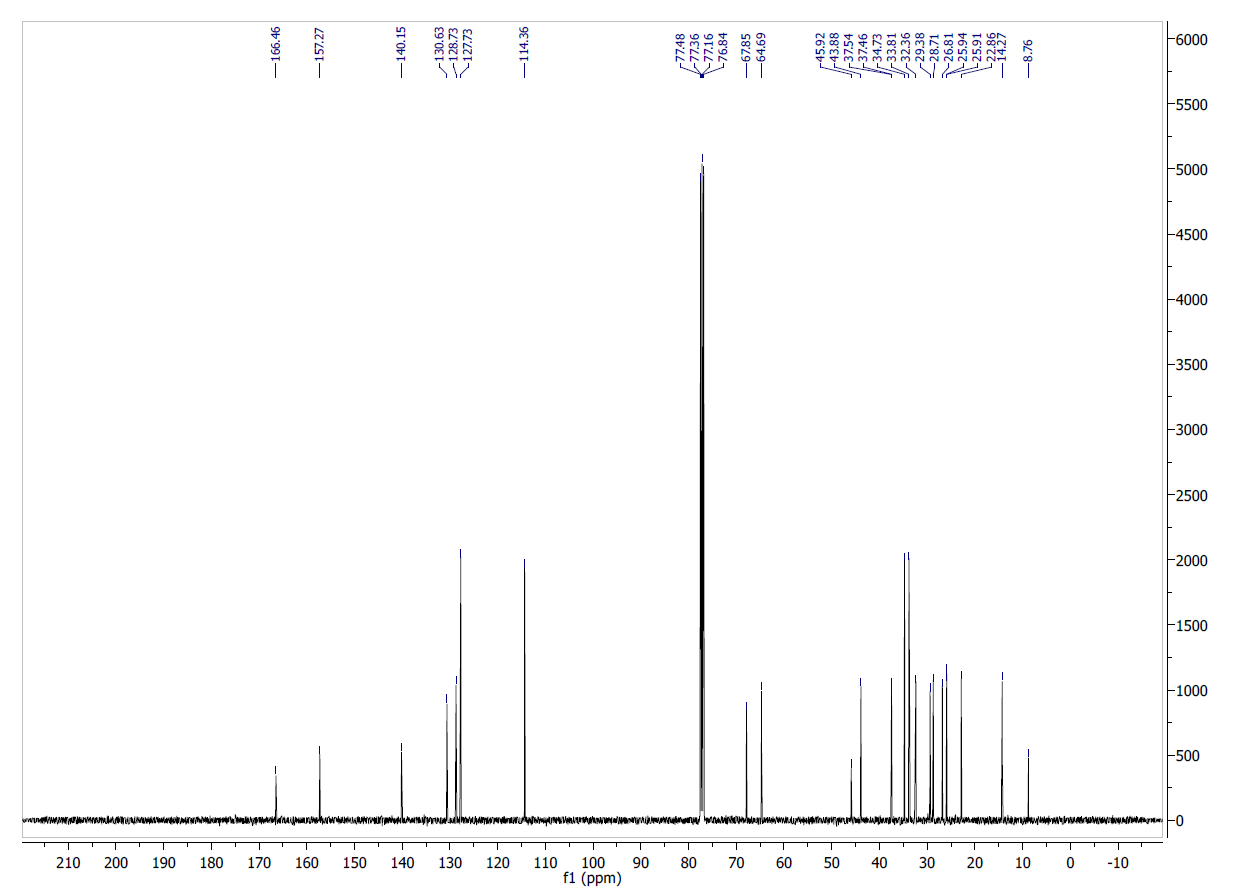


FigureS3. 1H NMR (TOP) (CDCl3, 400 MHz) and 13C NMR (BOTTOM) (CDCl3, 100 MHz) of compound **13**


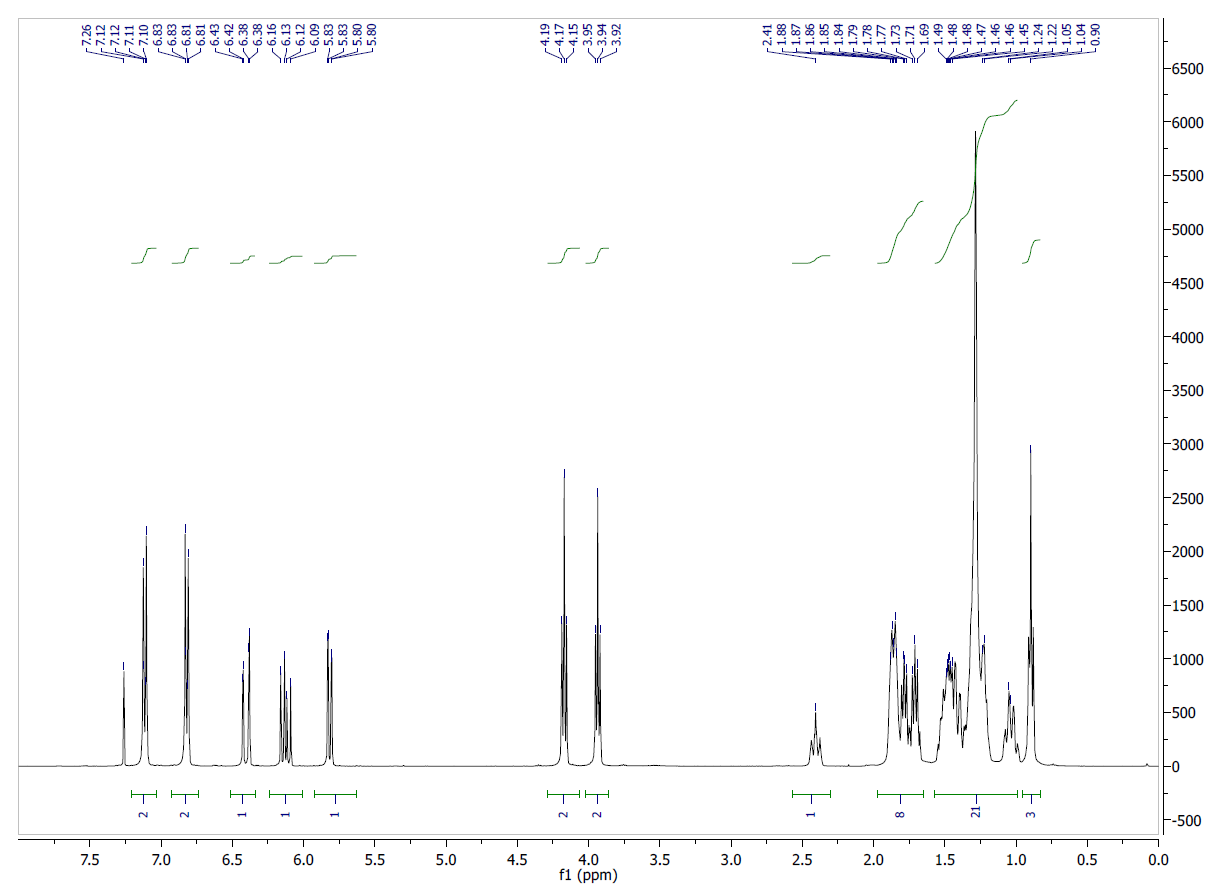


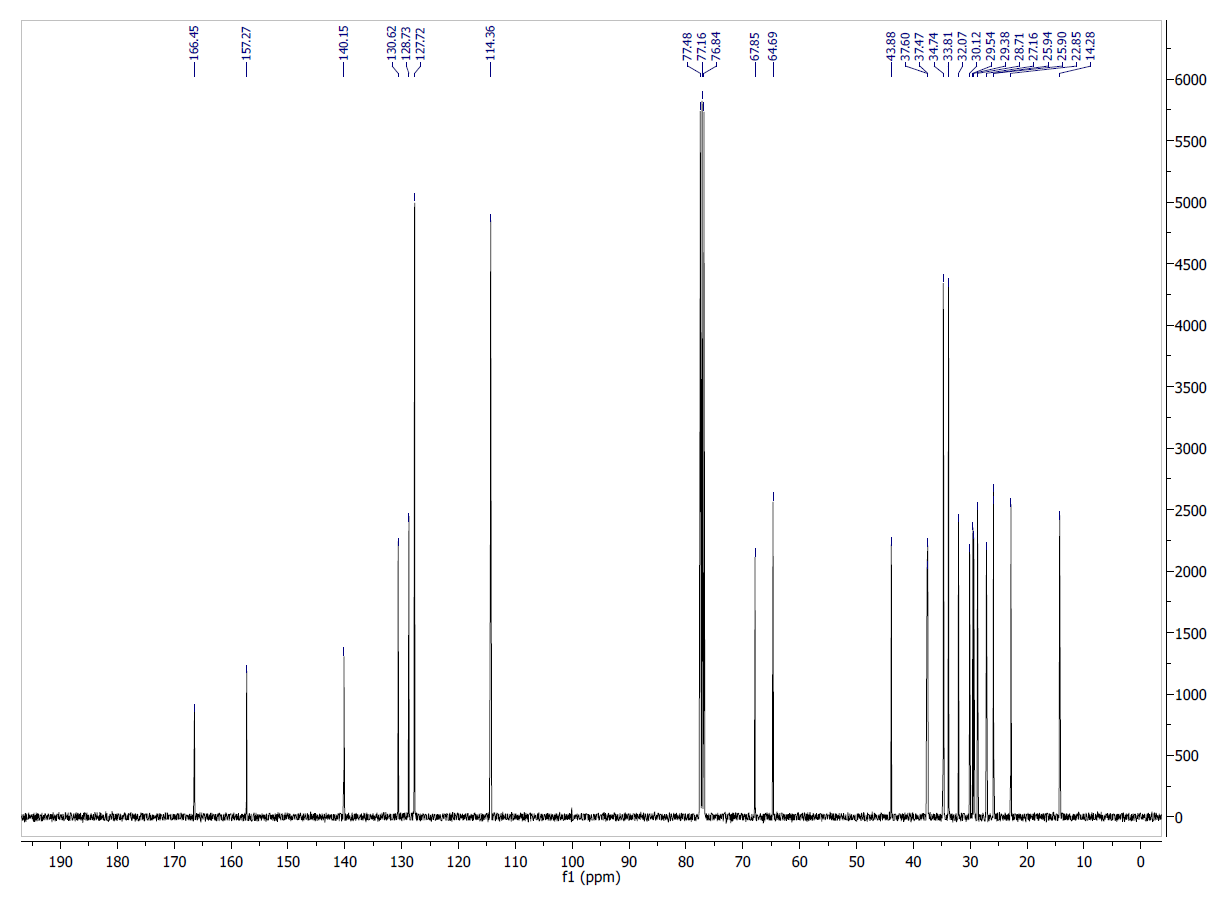


FigureS4. 1H NMR (TOP) (CDCl3, 400 MHz) and 13C NMR (BOTTOM) (CDCl3, 100 MHz) of compound **14**


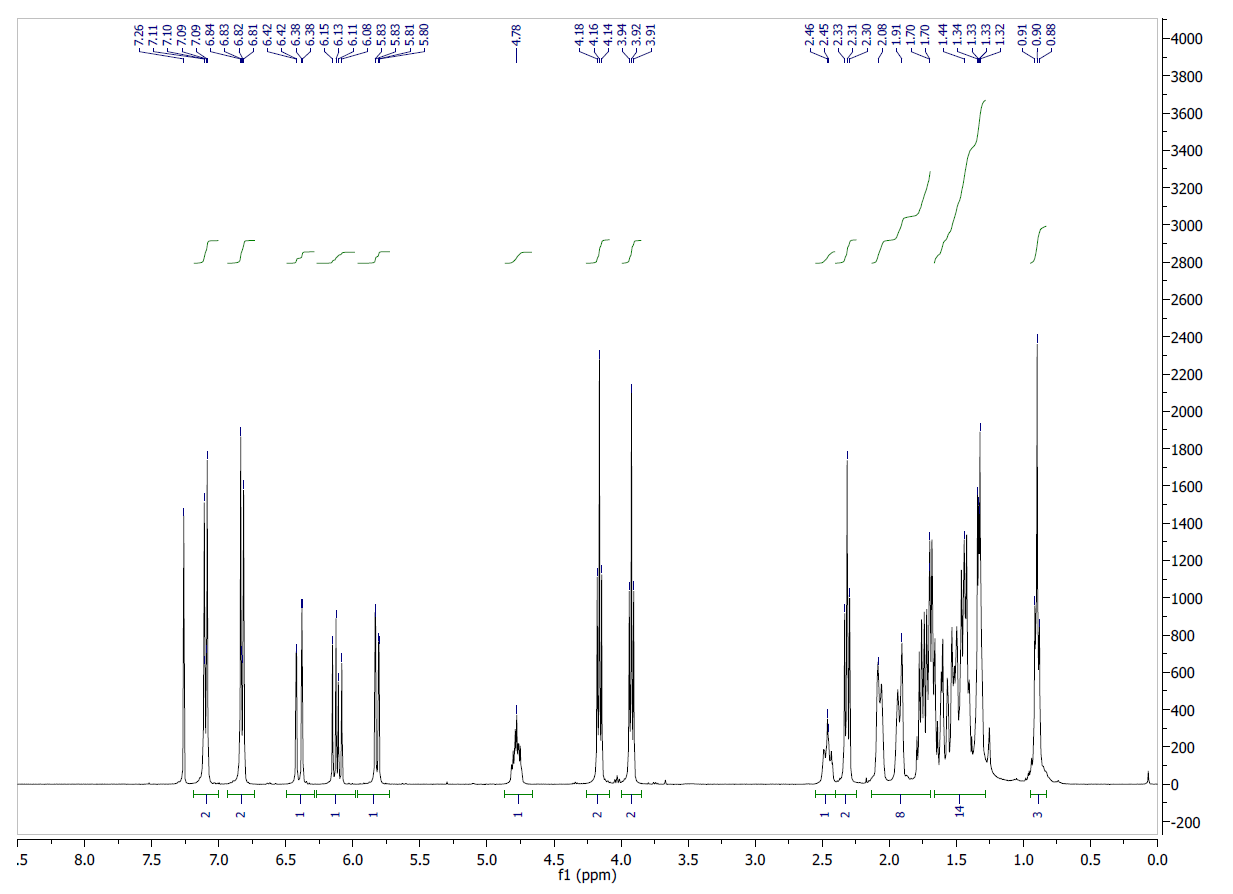

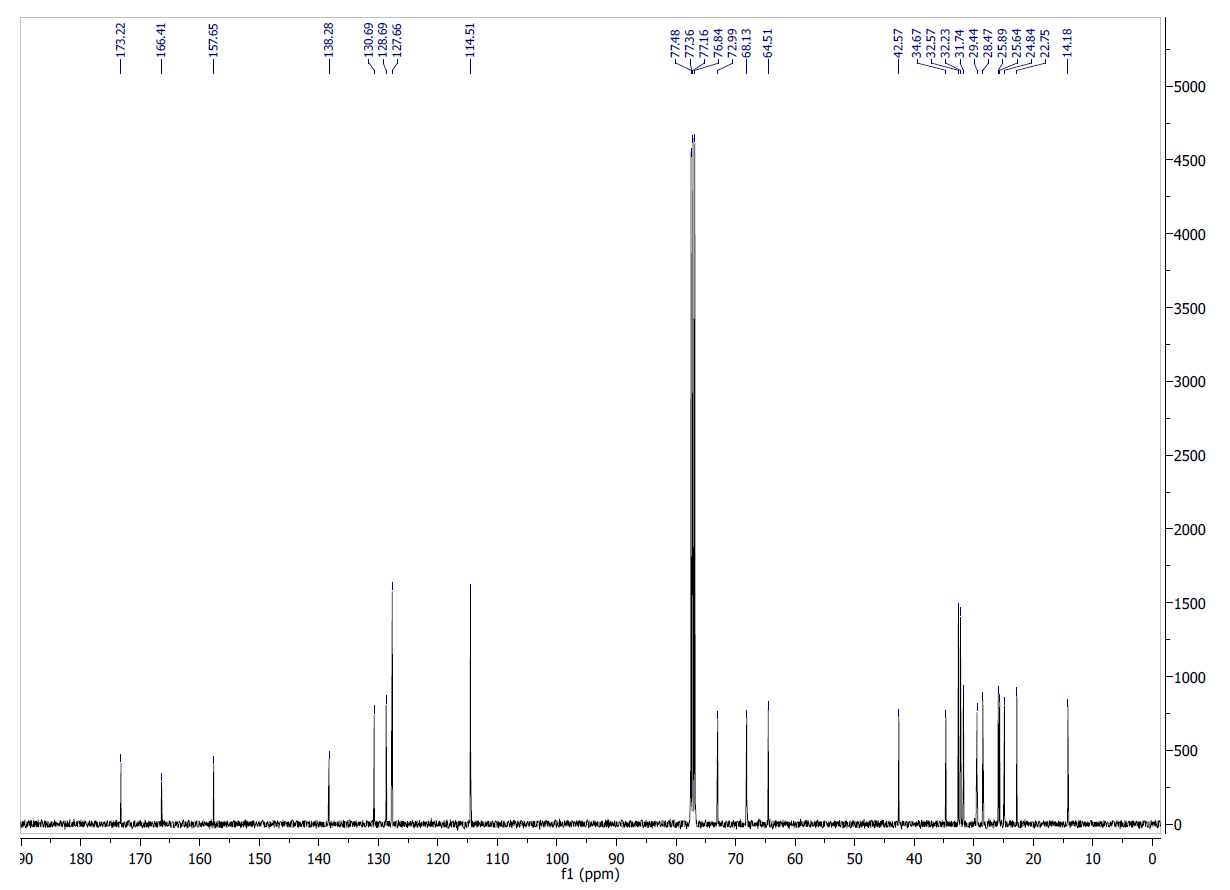


FigureS5. 1H NMR (TOP) (CDCl3, 400 MHz) and 13C NMR (BOTTOM) (CDCl3, 100 MHz) of compound **15**


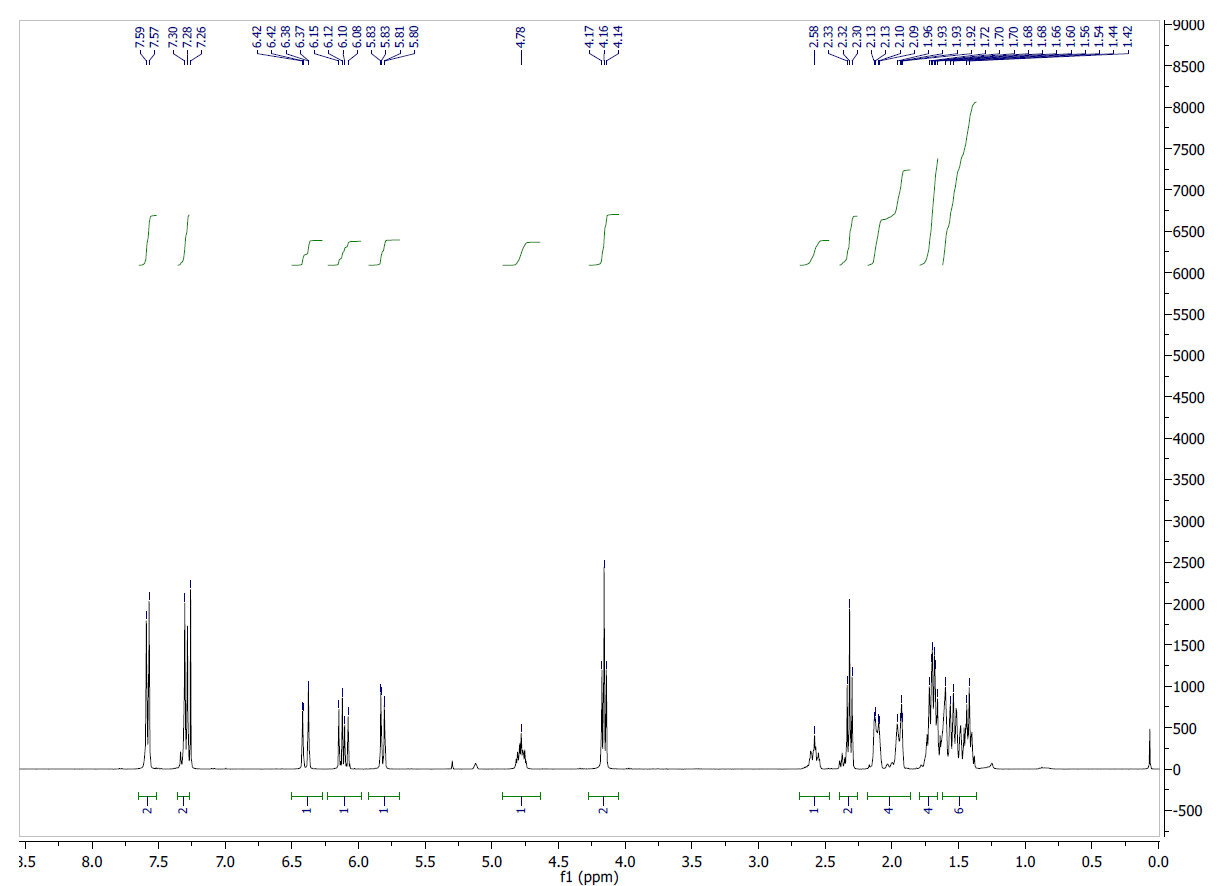

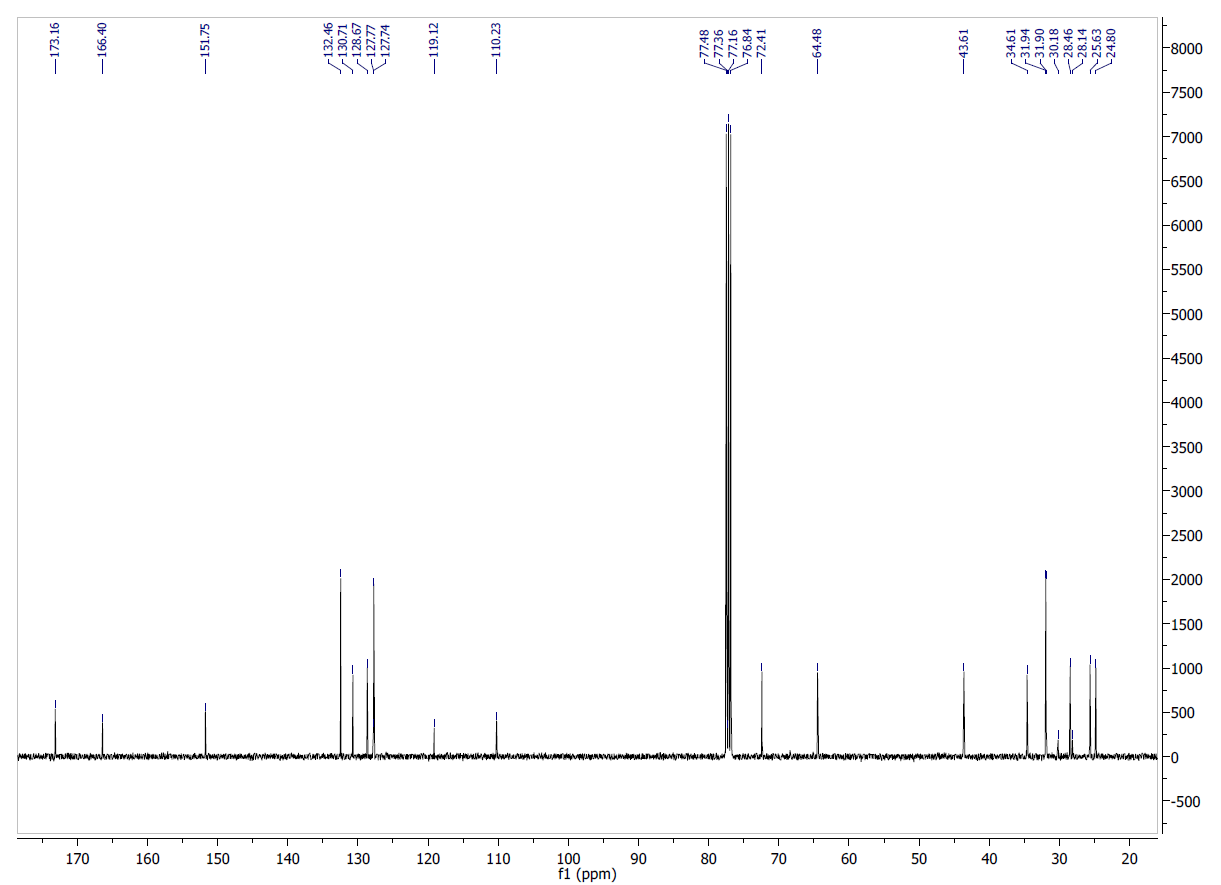


FigureS6. 1H NMR (TOP) (CDCl3, 400 MHz) and 13C NMR (BOTTOM) (CDCl3, 100 MHz) of compound **16**


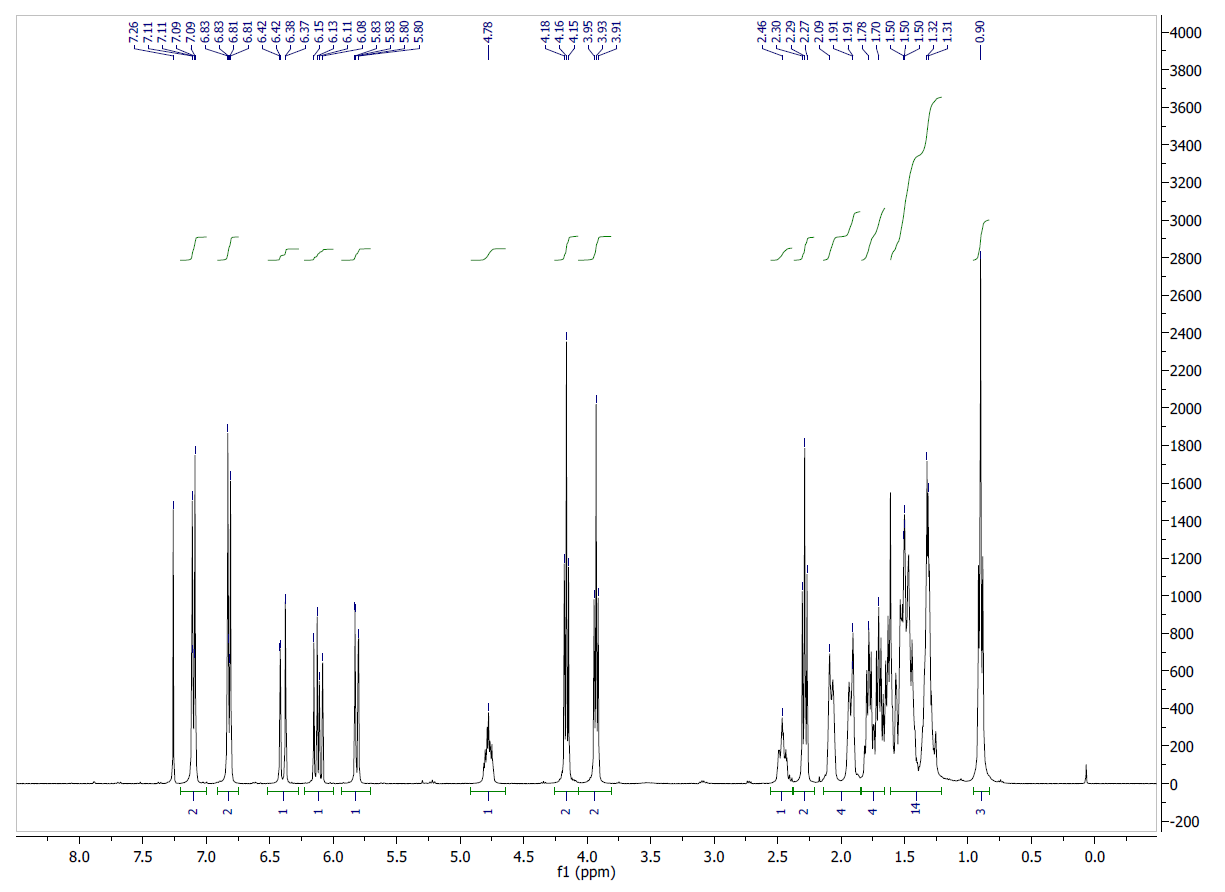

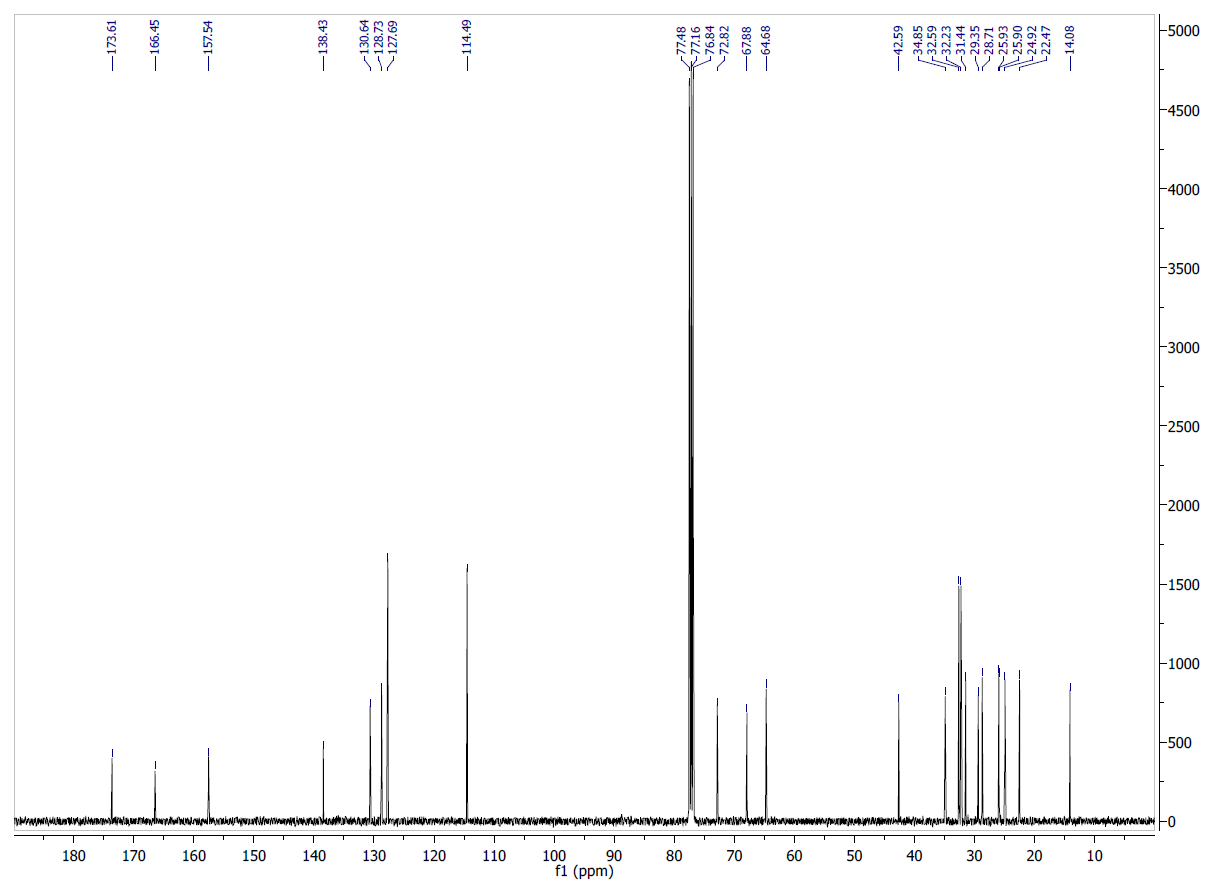


FigureS7. 1H NMR (TOP) (CDCl3, 400 MHz) and 13C NMR (BOTTOM) (CDCl3, 100 MHz) of compound **17**


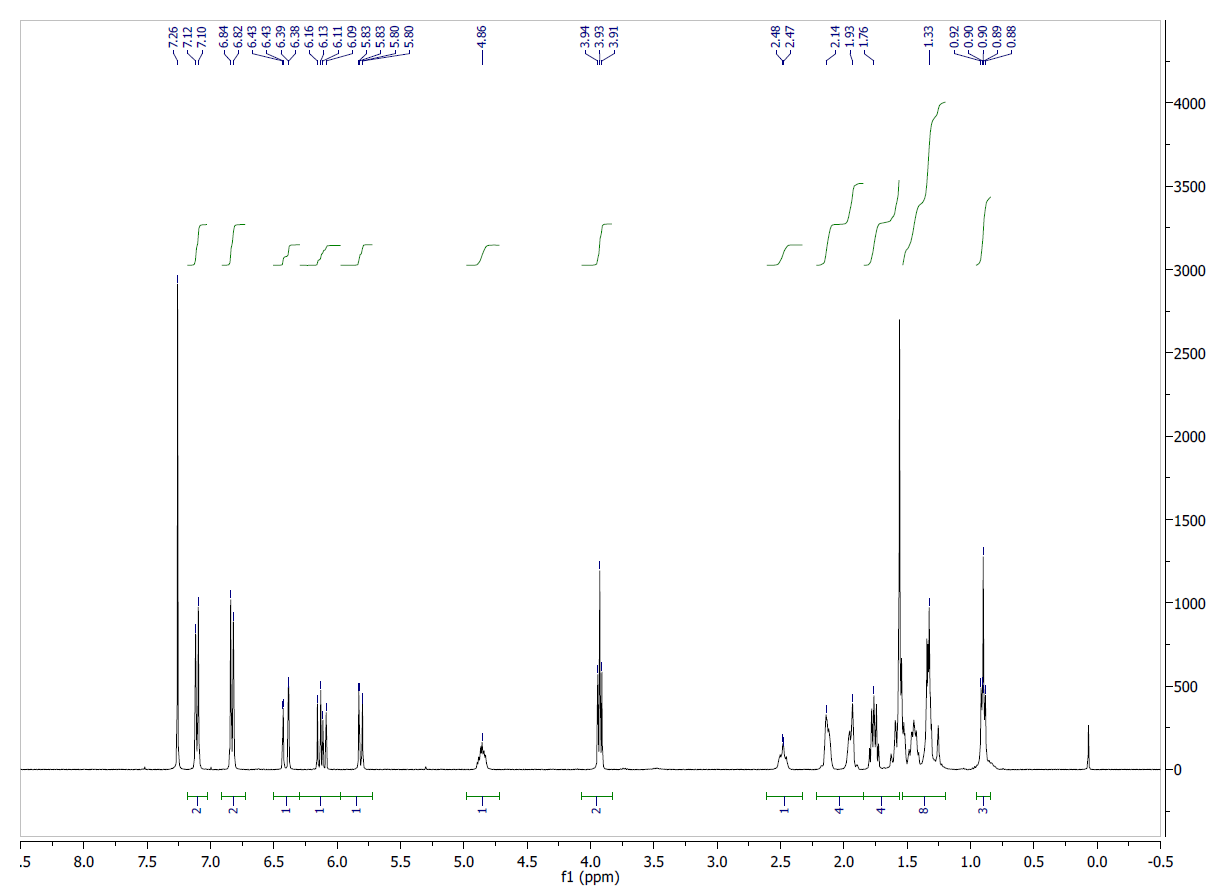


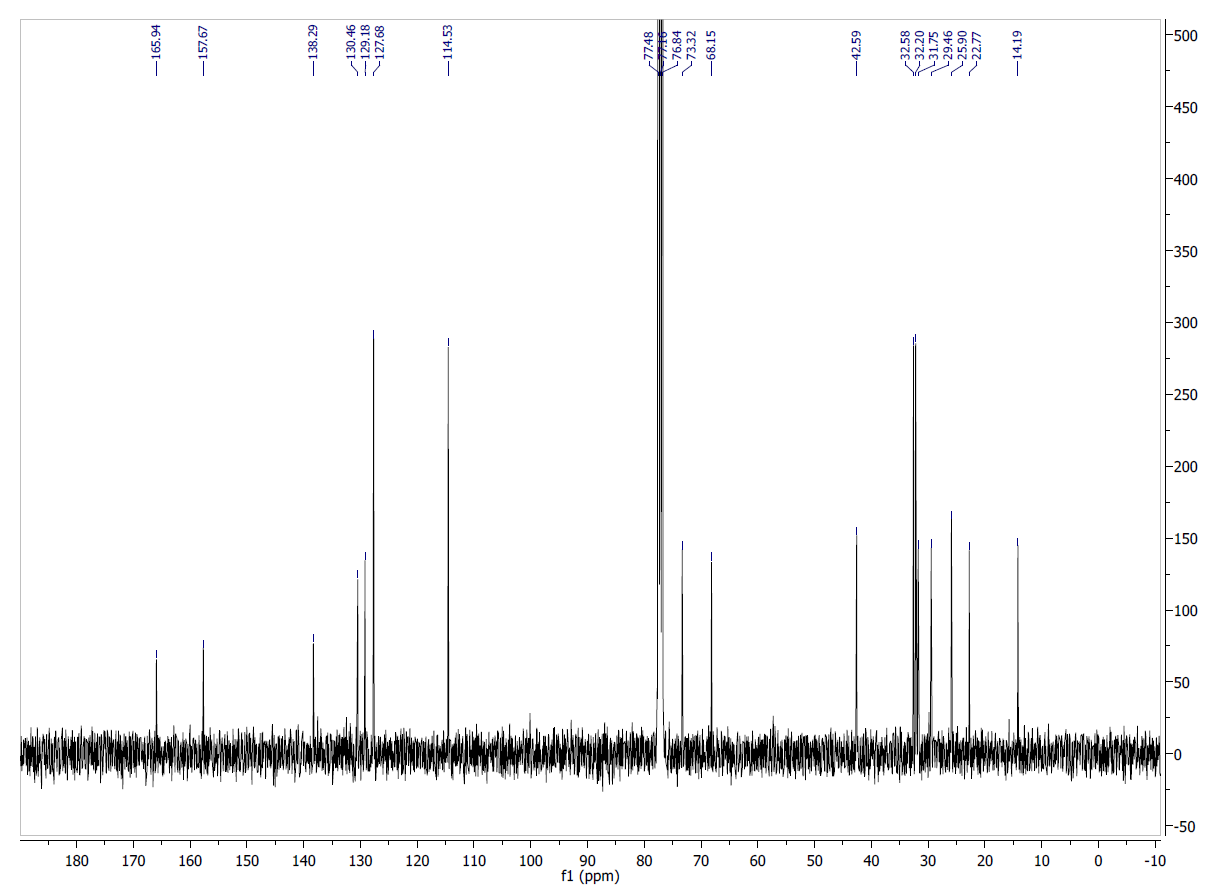


FigureS8. 1H NMR (TOP) (CDCl3, 400 MHz) and 13C NMR (BOTTOM) (CDCl3, 100 MHz) of compound **18**


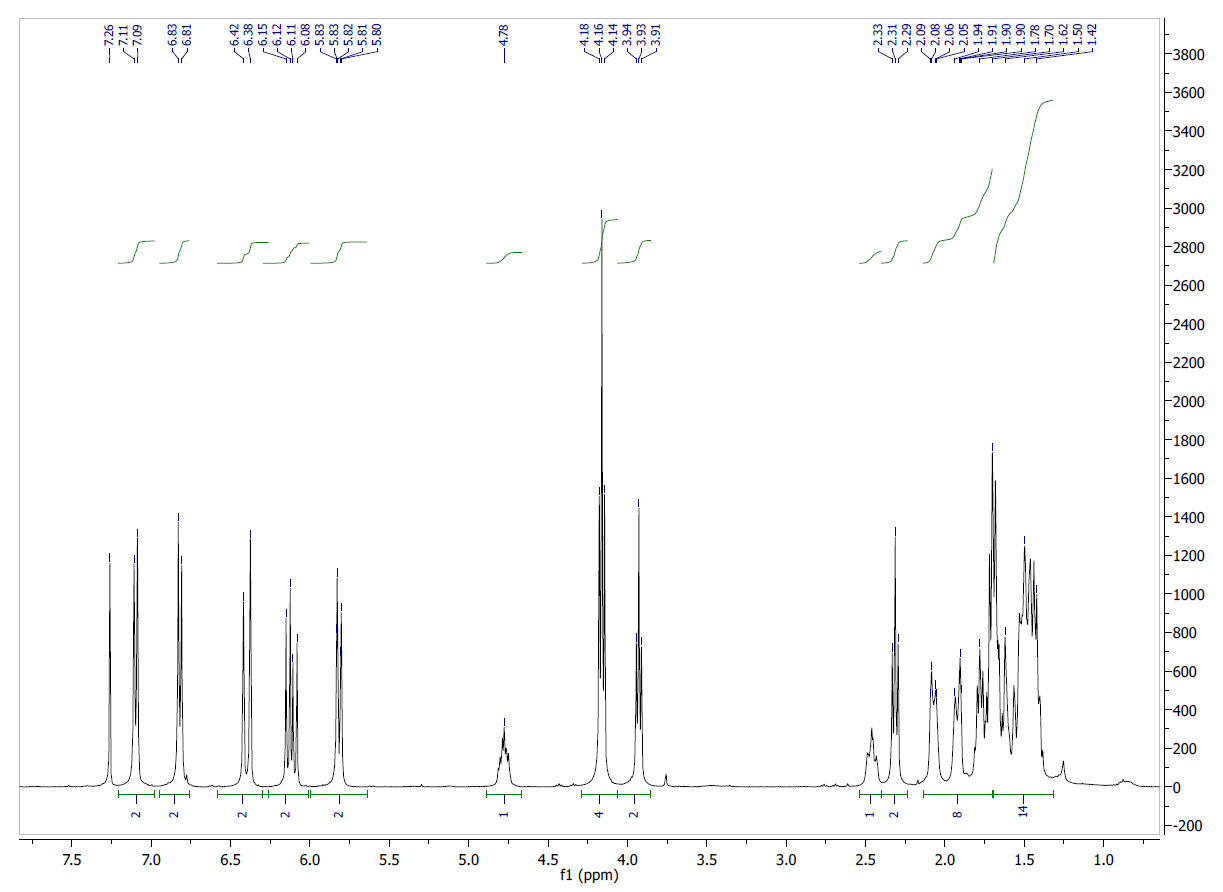

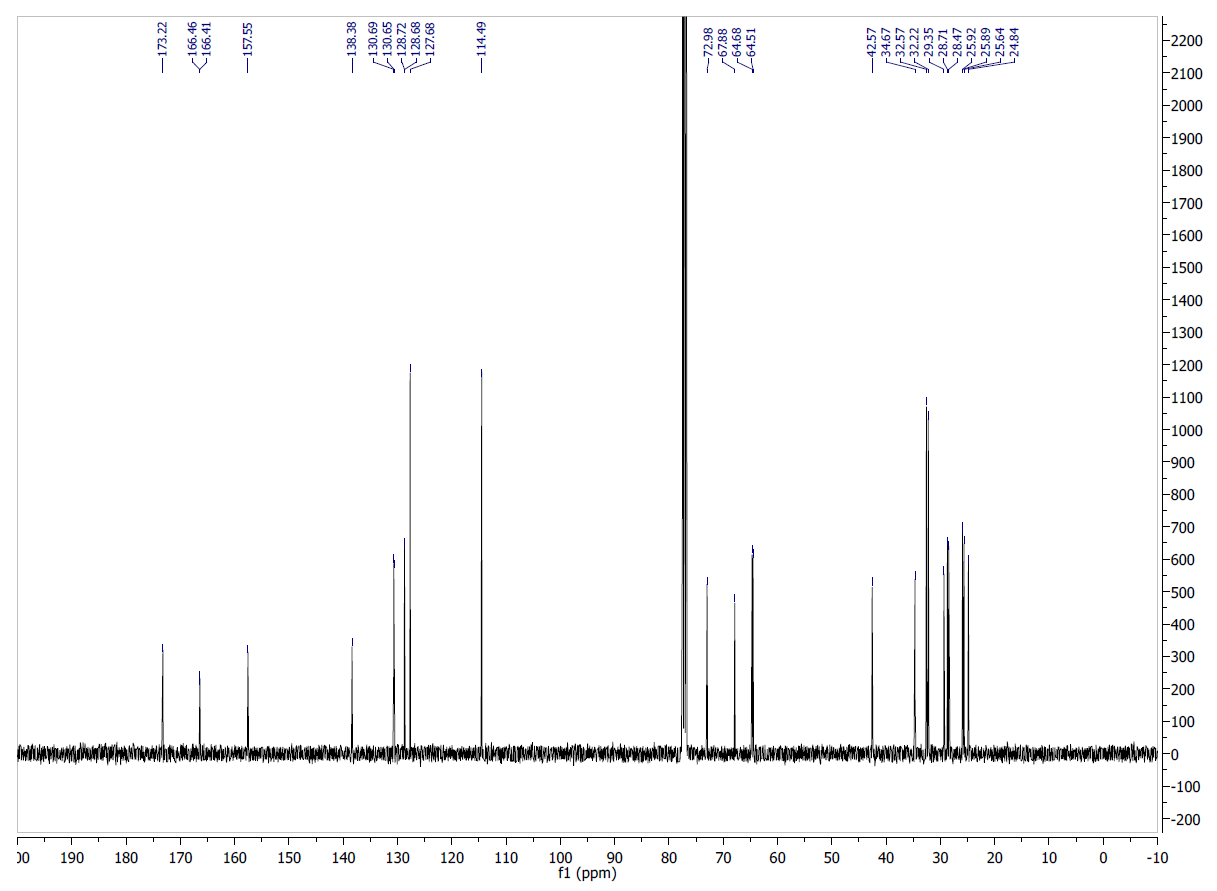


Figure S9. 1H NMR (TOP) (CDCl3, 400 MHz) and 13C NMR (BOTTOM) (CDCl3, 100 MHz) of compound **19**


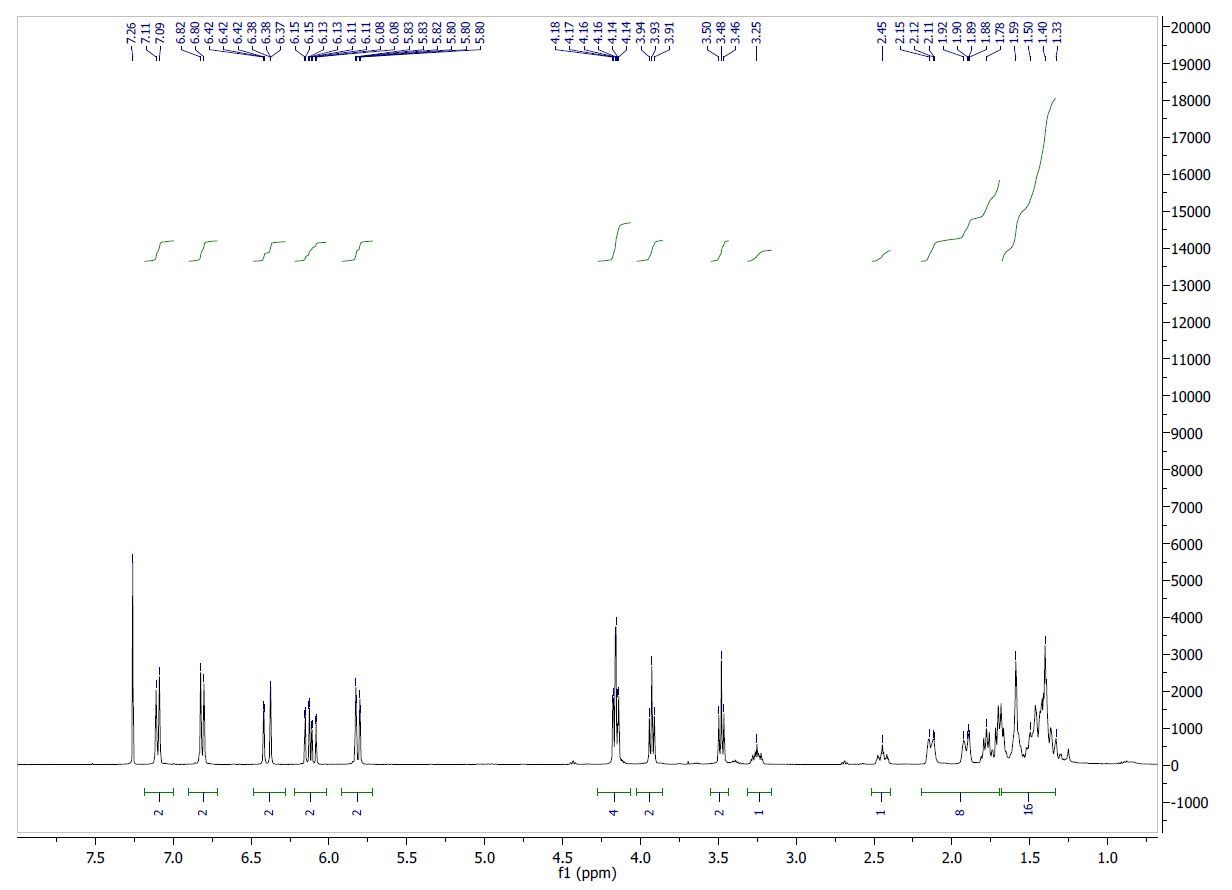

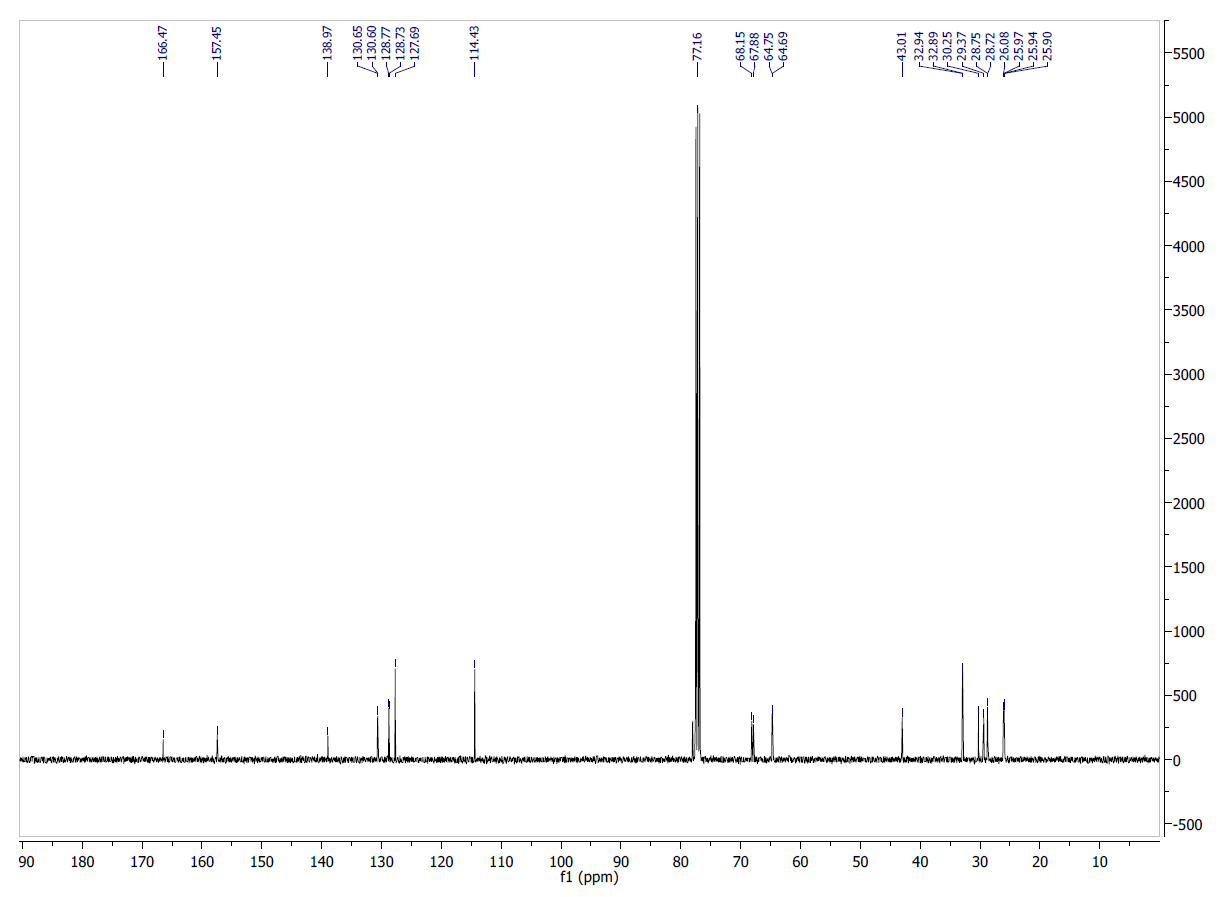


FigureS10. 1H NMR (TOP) (CDCl3, 400 MHz) and 13C NMR (BOTTOM) (CDCl3, 100 MHz) of compound **20**


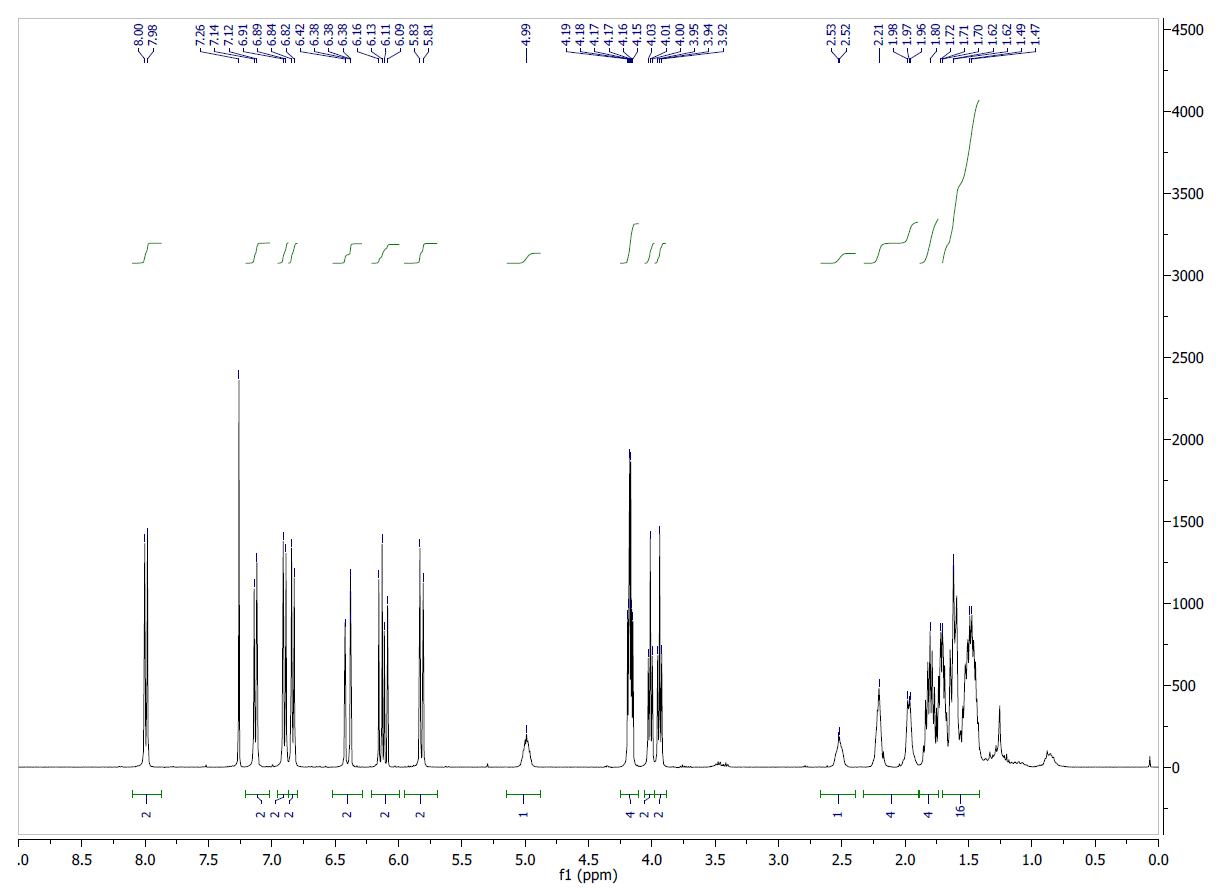

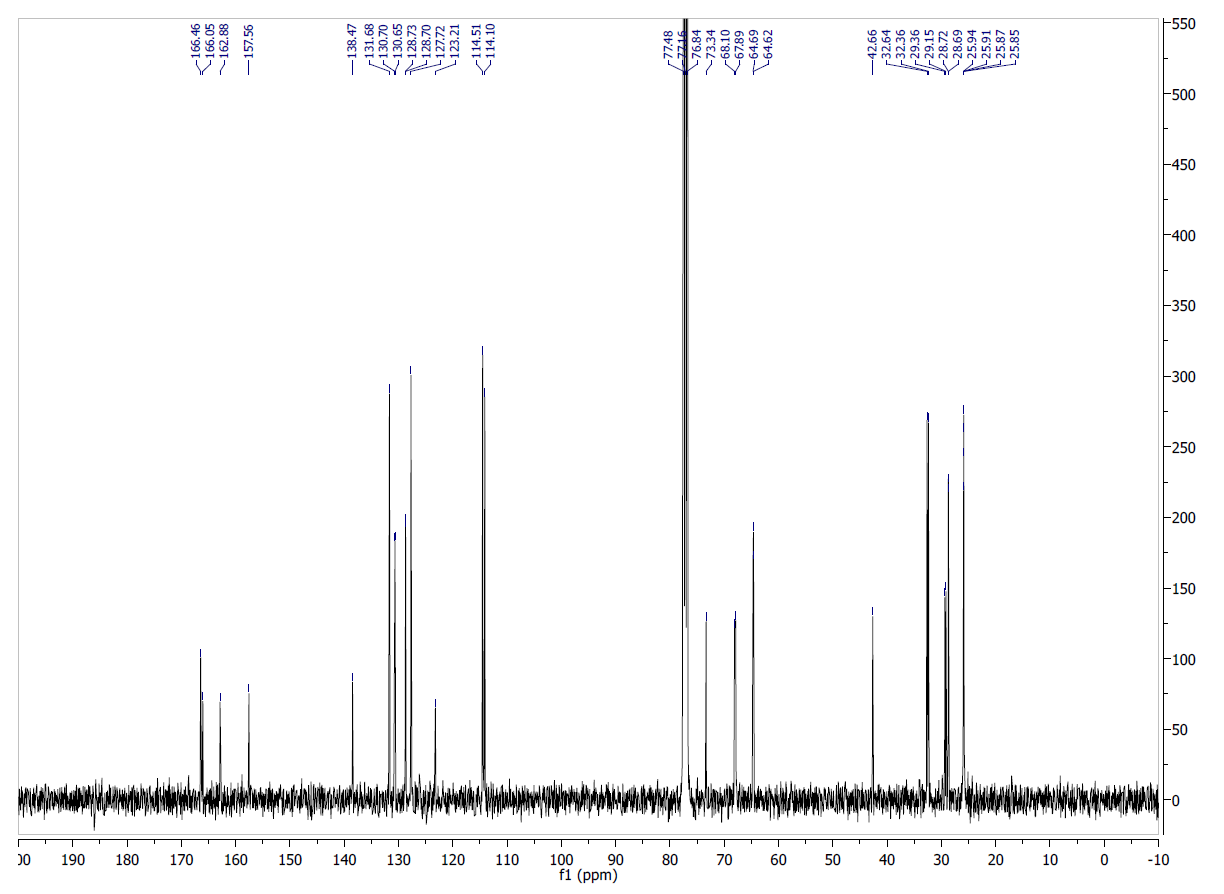


FigureS11. 1H NMR (TOP) (CDCl3, 400 MHz) and 13C NMR (BOTTOM) (CDCl3, 100 MHz) of compound **21**


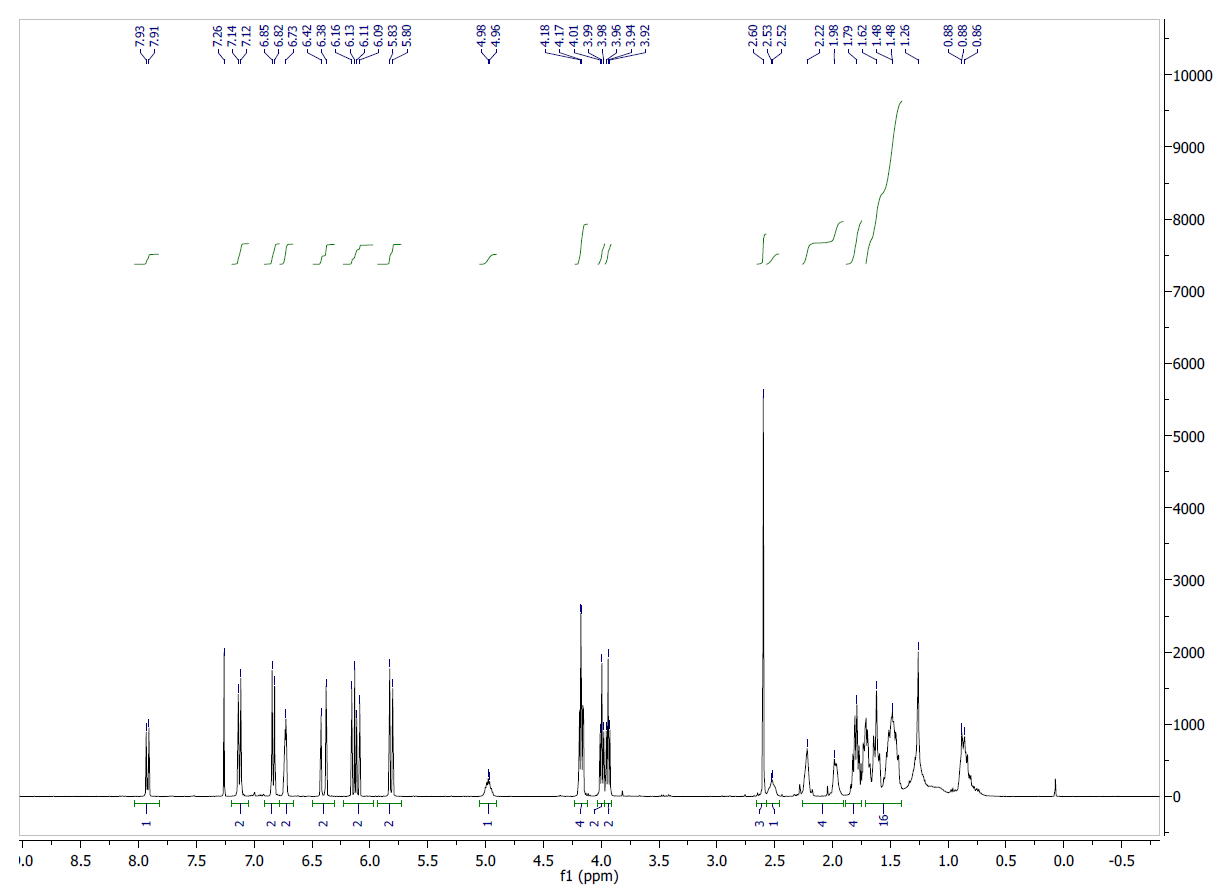

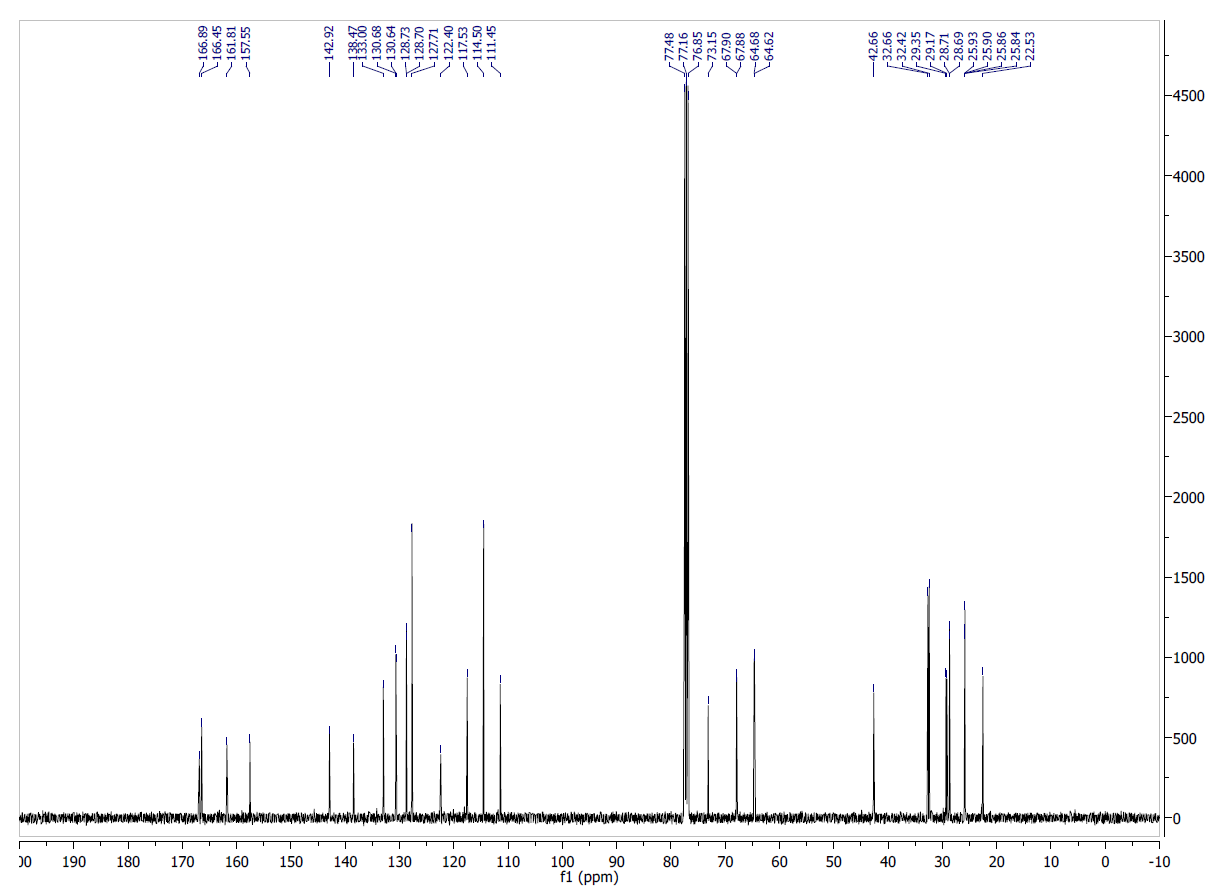


FigureS12. 1H NMR (TOP) (CDCl3, 400 MHz) and 13C NMR (BOTTOM) (CDCl3, 100 MHz) of compound **22**


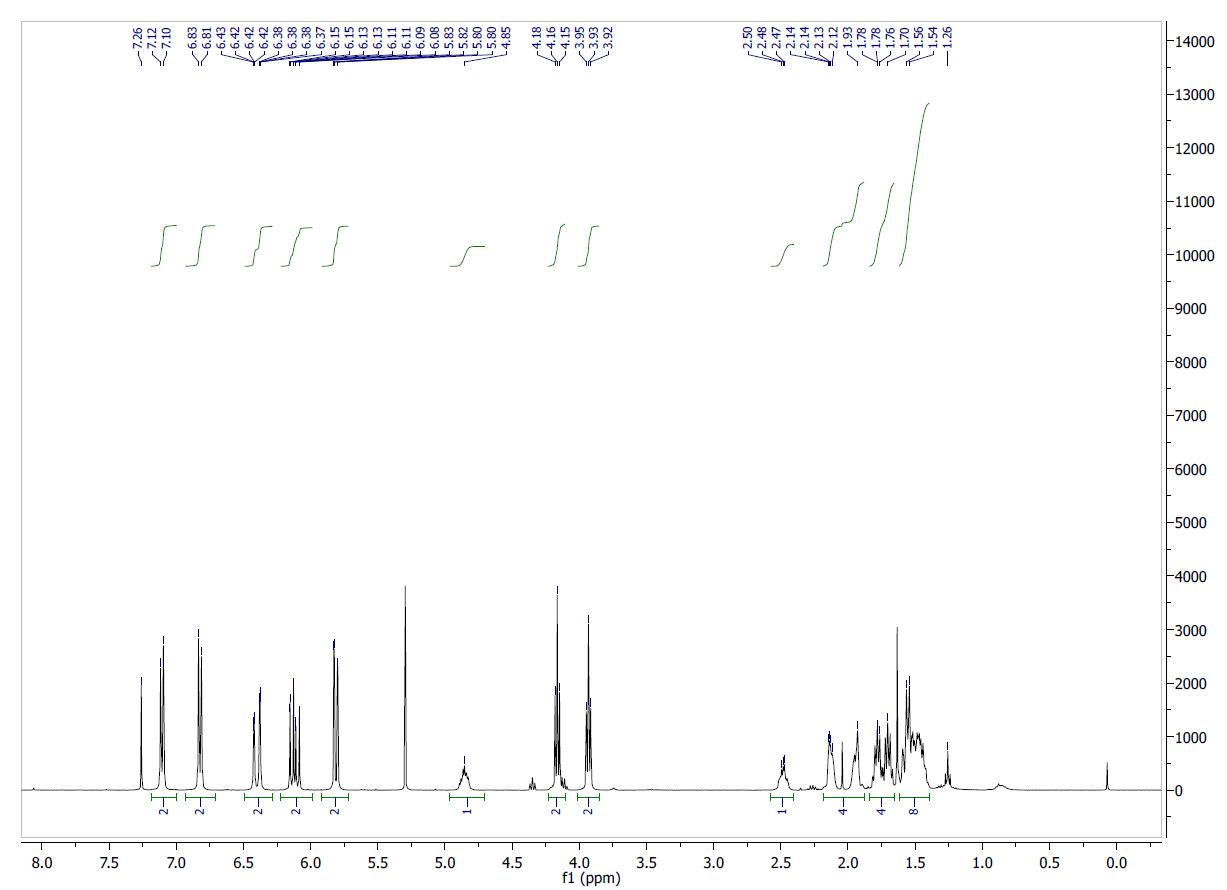

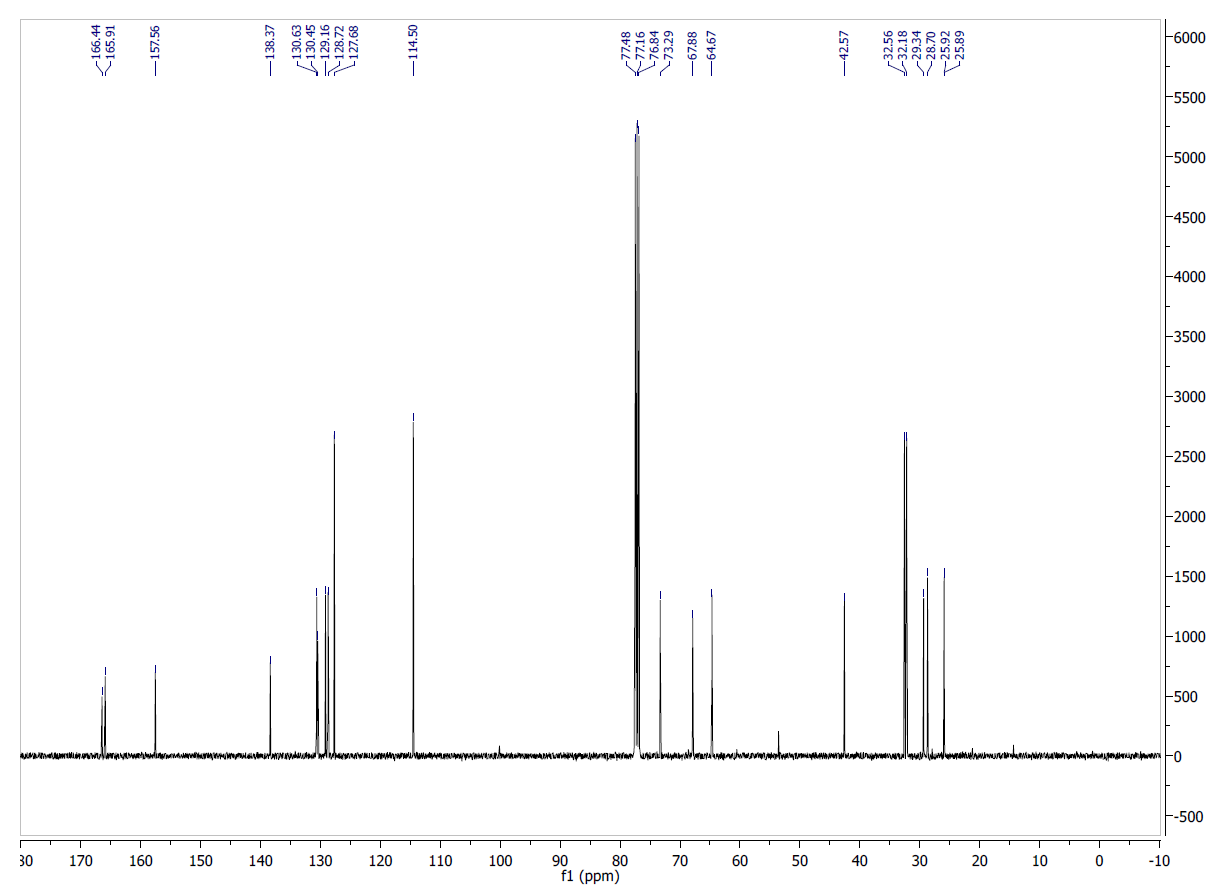


FigureS13. 1H NMR (TOP) (CDCl3, 400 MHz) and 13C NMR (BOTTOM) (CDCl3, 100 MHz) of compound **23**


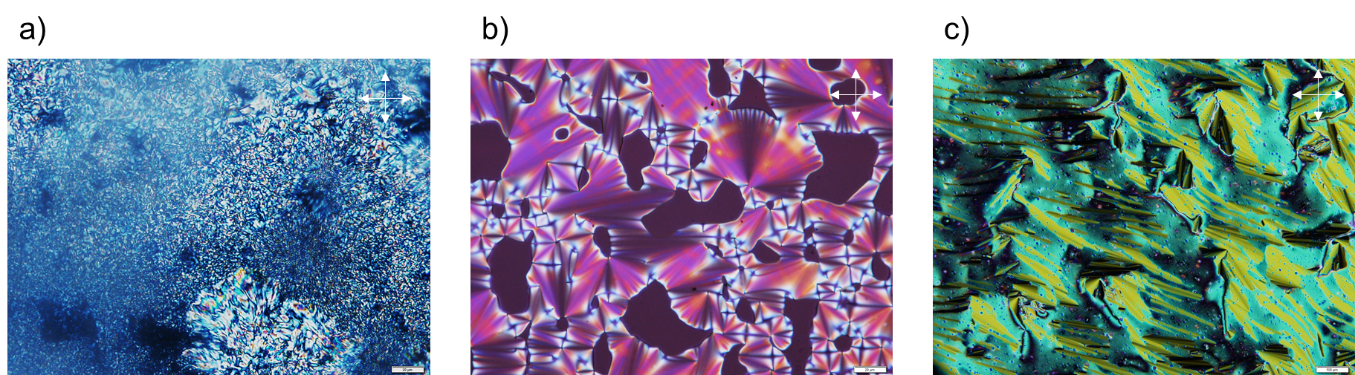


FigureS14. Polarized optical microscopy images of LC textures of compound 20 (-10oC) (a), compound 21 (100oC) (b), and compound 22 (50oC) (c). Scale bares correspond to 20, 100 and 20 m, respectively. Polarizer and analyzer are represented with white arrows.


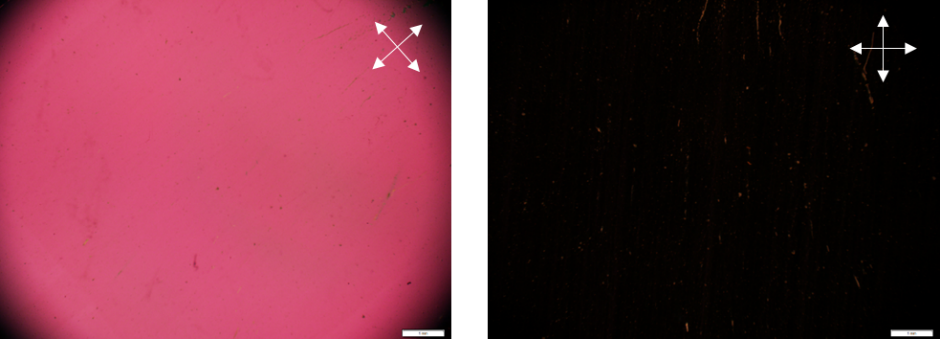


FigureS15. Polarized optical microscopy images of LCPN film TN with unidirectional alignment. Scale bare corresponds to 1mm. Polarizer and analyzer are represented with white arrows.

Table S1. Compositions (in wt.%) and nematic to isotropic transition temperatures of the mixtures consisting of mono-acrylates **12-14**.

|  | 12 | 13 | 14 | TN-I, oC |
| --- | --- | --- | --- | --- |
| Mix1 | 30 | 30 | 40 | 21.9 |
| Mix2 | 10 | 30 | 60 | 26.7 |
| Mix3 | 10 | 20 | 70 | 27.1 |
| Mix4 | 0 | 50 | 50 | 27.5 |
| Mix5 | 0 | 40 | 60 | 29.0 |
